# Supplementary material for: Evaluation of Assembly Strategies Using RNA-Seq Data Associated with Grain Development of Wheat (Triticum aestivum L.)
Source: PLoS One. 2013 Dec 12;8(12):e83530. doi: 10.1371/journal.pone.0083530 (PMC3861526; doi:10.1371/journal.pone.0083530)
Supplement: Table S3 — Velvet-Oases assembly. (XLSX) [file pone.0083530.s003.xlsx]

## Sheet: Table S3 Velvet-Oases
Table S3 Statistics of Velvet-Oases assembly
Library Mix	Single k-mer assembly													Multiple k-mer assembly
Metrics	k25	k31	k37	k43	k49	k55	k61	k67	k73	k79	k85	k91	k97	k25-k97
Total sequences	53975	55925	59025	60181	59328	56370	50468	41713	31870	21333	11617	3985	332	222425
Total bases	57468484	62216520	66906948	66682177	63945199	57468484	47519087	35397361	24543528	14578867	6929390	2179979	193812	245406646
Min sequence length	300	300	300	300	300	300	300	300	300	300	300	300	300	300
Max sequence length	19654	19738	31471	31477	29708	29643	29643	29643	24822	18376	5446	6147	2586	31477
Average sequence length	1064.72	1112.5	1133.54	1108.03	1077.82	1019.49	941.57	848.59	770.11	683.4	596.49	547.05	583.77	1103.32
Median sequence length	810	888	919	898	867	820	747	666	599	530	471	427	449	898
N25 length	1982	2173	2176	2128	2070	1934	1780	1599	1449	1277	1039	893	1058	2066
N50 length	1303	1473	1502	1468	1434	1340	1219	1073	949	805	657	576	641	1408
N75 length	821	909	937	917	883	825	740	648	573	496	426	387	409	889
N90 length	523	542	555	541	524	498	461	419	388	356	335	325	334	562
N95 length	398	415	421	410	403	389	373	352	335	322	313	308	310	437
As	0.2373	0.2378	0.2381	0.2394	0.2406	0.2417	0.2429	0.2436	0.2439	0.2433	0.241	0.2389	0.2538	0.2387
Ts	0.234	0.2345	0.2351	0.2357	0.2364	0.2376	0.2385	0.238	0.2376	0.2368	0.2345	0.2313	0.2239	0.2347
Gs	0.2652	0.2647	0.2641	0.2638	0.2629	0.2622	0.2609	0.2606	0.2614	0.2623	0.2644	0.2649	0.2537	0.2644
Cs	0.2627	0.2627	0.2626	0.2611	0.26	0.2585	0.2577	0.2578	0.2572	0.2576	0.26	0.2649	0.2686	0.2623
(A + T)s	0.4713	0.4724	0.4732	0.4751	0.4771	0.4793	0.4814	0.4816	0.4814	0.4801	0.4755	0.4702	0.4778	0.4733
(G + C)s	0.5275	0.5274	0.5267	0.5249	0.5229	0.5207	0.5186	0.5184	0.5186	0.5199	0.5245	0.5298	0.5222	0.5267
Ns	0.0002	0.0002	0.0001	0	0	0	0	0	0	0	0	0	0	0
Library EDAP4	Single k-mer assembly													Multiple k-mer assembly
Metrics	k25	k31	k37	k43	k49	k55	k61	k67	k73	k79	k85	k91	k97	k25-k97
Total sequences	24831	23727	23228	23159	22241	20576	18215	15365	10952	5911	2362	703	121	201371
Total bases	25871761	25544175	24241172	23586599	22120327	19511029	15595064	11551984	7646192	4388748	2011159	814737	297749	164534381
Min sequence length	296	296	296	296	296	296	296	296	296	296	296	296	298	296
Max sequence length	47938	76137	38593	93882	118172	101464	101361	101813	53774	101280	72073	62025	25190	118562
Average sequence length	1041.91	1076.59	1043.62	1018.46	994.57	948.24	856.17	751.84	698.15	742.47	851.46	1158.94	2460.74	817.07
Median sequence length	689	719	715.5	707	688	674	620	541	472	436	430	430	788	562
N25 length	2603	2683	2497	2321	2226	1995	1714	1508	1515	2955	24202	52983	18833	1870
N50 length	1344	1392	1359	1338	1279	1188	1029	850	756	808	1018	3523	7949	923
N75 length	762	794	777	761	732	692	618	525	459	447	484	640	2291	558
N90 length	456	476	469	462	454	449	416	378	350	340	346	370	914	400
N95 length	367	377	374	369	365	367	351	334	321	316	318	329	469	349
As	0.242	0.2428	0.2426	0.2428	0.2425	0.2429	0.2425	0.243	0.2487	0.2643	0.2801	0.2929	0.2994	0.2731
Ts	0.2384	0.2394	0.2387	0.2394	0.2405	0.2392	0.2379	0.2377	0.2456	0.2623	0.2738	0.2834	0.2915	0.277
Gs	0.2612	0.2604	0.261	0.2608	0.2597	0.2613	0.2617	0.2627	0.2546	0.2363	0.2224	0.2126	0.2071	0.2237
Cs	0.2578	0.2571	0.2575	0.2568	0.2572	0.2566	0.2579	0.2566	0.2511	0.2372	0.2238	0.2111	0.2021	0.2262
(A + T)s	0.4805	0.4822	0.4813	0.4822	0.483	0.482	0.4804	0.4807	0.4943	0.5265	0.5539	0.5763	0.5909	0.5501
(G + C)s	0.5191	0.5175	0.5185	0.5176	0.5169	0.5179	0.5196	0.5192	0.5057	0.4735	0.4461	0.4237	0.4091	0.4499
Ns	0.0005	0.0003	0.0002	0.0002	0.0001	0.0001	0	0	0	0	0	0	0	0
Library EDAP8	Single k-mer assembly													Multiple k-mer assembly
Metrics	k25	k31	k37	k43	k49	k55	k61	k67	k73	k79	k85	k91	k97	k25-k97
Total sequences	20465	19763	19277	19095	17780	15965	12938	9897	6971	4293	2129	701	68	92707
Total bases	19207972	18591611	18037764	17617880	15747275	13544466	10806069	7497158	5123798	3108053	1533939	530955	38517	80557196
Min sequence length	296	296	296	296	296	296	296	296	296	296	296	296	298	296
Max sequence length	11489	7393	59916	16853	24101	65588	65396	59865	54276	54927	40322	25142	2697	65579
Average sequence length	938.58	940.73	935.71	922.64	885.67	848.38	835.22	757.52	735.02	723.98	720.5	757.43	566.43	868.94
Median sequence length	734	739	736	719	695	664	619	563	516	460	438	443	406.5	647
N25 length	1791	1796	1789	1796	1665	1583	1630	1445	1402	1761	2598	2477	1356	1688
N50 length	1185	1193	1174	1177	1108	1046	1015	882	826	776	746	865	624	1039
N75 length	721	727	725	712	679	646	610	542	505	461	442	458	383	629
N90 length	469	466	466	453	442	424	410	382	361	345	341	343	331	447
N95 length	381	379	379	368	366	356	348	336	325	317	317	316	315	374
As	0.2481	0.2489	0.2492	0.2502	0.2503	0.2514	0.2533	0.2536	0.2581	0.2586	0.2631	0.2689	0.2602	0.2614
Ts	0.246	0.2459	0.2453	0.2462	0.2464	0.2466	0.2484	0.2478	0.2537	0.2597	0.2567	0.2626	0.2665	0.2585
Gs	0.2539	0.254	0.2546	0.2544	0.2533	0.2534	0.2512	0.2525	0.2477	0.2437	0.2401	0.2367	0.2339	0.239
Cs	0.2516	0.2511	0.2507	0.2491	0.2499	0.2485	0.2471	0.2461	0.2405	0.238	0.24	0.2317	0.2393	0.2411
(A + T)s	0.4941	0.4948	0.4945	0.4964	0.4967	0.498	0.5017	0.5014	0.5117	0.5183	0.5198	0.5315	0.5267	0.5199
(G + C)s	0.5055	0.5051	0.5054	0.5035	0.5032	0.5019	0.4983	0.4986	0.4883	0.4817	0.4802	0.4685	0.4733	0.4801
Ns	0.0004	0.0001	0.0001	0.0002	0	0	0	0	0	0	0	0	0	0
Library EDAP12	Single k-mer assembly													Multiple k-mer assembly
Metrics	k25	k31	k37	k43	k49	k55	k61	k67	k73	k79	k85	k91	k97	k25-k97
Total sequences	13949	13172	12475	12731	11433	9813	7901	5927	4003	2561	1356	560	134	87215
Total bases	12269702	11858477	11469062	10823465	9634281	8466081	6294327	4541643	3234610	2097421	1187176	542174	91491	74279301
Min sequence length	296	296	296	296	296	296	296	296	296	296	296	296	296	296
Max sequence length	9479	10113	59209	17859	19824	65122	65120	62204	55421	40414	38658	22819	2445	65437
Average sequence length	879.61	900.28	919.36	850.17	842.67	862.74	796.65	766.26	808.05	818.99	875.5	968.17	682.77	851.68
Median sequence length	687	698	685	633	644	625	587	539	497	464	472	506	556	657
N25 length	1670	1757	1817	1722	1635	1760	1573	1579	2022	15082	15082	4937	1142	1576
N50 length	1099	1118	1152	1083	1041	1045	938	882	914	929	1044	1296	729	1005
N75 length	668	684	687	631	629	626	573	531	518	502	525	607	502	627
N90 length	440	449	445	408	416	415	396	374	366	354	359	375	388	448
N95 length	365	369	365	343	349	350	341	329	325	321	323	330	337	377
As	0.2518	0.2519	0.2526	0.2536	0.2529	0.2577	0.2559	0.2562	0.2624	0.264	0.2688	0.279	0.2695	0.2845
Ts	0.2496	0.2489	0.2507	0.251	0.2498	0.2499	0.2502	0.2555	0.2649	0.2689	0.267	0.2729	0.239	0.2854
Gs	0.2511	0.252	0.25	0.25	0.2517	0.2482	0.2507	0.2475	0.2381	0.2363	0.2342	0.2221	0.2276	0.214
Cs	0.247	0.2469	0.2465	0.2451	0.2455	0.2442	0.2432	0.2408	0.2345	0.2309	0.2299	0.2259	0.264	0.2161
(A + T)s	0.5014	0.5008	0.5033	0.5046	0.5027	0.5075	0.5061	0.5117	0.5274	0.5328	0.5359	0.552	0.5085	0.5699
(G + C)s	0.4981	0.4989	0.4965	0.4951	0.4972	0.4924	0.4939	0.4883	0.4726	0.4672	0.4641	0.448	0.4915	0.4301
Ns	0.0006	0.0002	0.0002	0.0003	0.0001	0.0001	0	0	0	0	0	0	0	0

## Sheet: Total sequences
ANOVA table of total sequences
Source of Variability	SS	df	MS	F	P-value	F crit
Program	5.98032e+09	12	4.9836e+08	8.09333	4.6004e-07	2.0327
Library	7.85084e+09	3	2.61695e+09	42.499	6.43322e-12	2.86627
Error	2.21676e+09	36	6.15766e+07
Total	1.60479e+10	51
LSD multiple comparison
	Total sequences
Program	Average	Sd	Sig 5%	Sig 1%
k43	28305	17687.8	a	AB
k37	28146.8	19023.6	a	AB
k25	28501.2	20828.1	a	AB
k31	28791.5	21361.9	a	A
k49	27695.5	21549.6	a	AB
k55	25681	20929	a	AB
k61	22380.5	19192.7	ab	ABC
k67	18225.5	16129.3	abc	ABCD
k73	13449	12606.3	bcd	BCDE
k79	8524.5	8647.87	cde	CDE
k85	4366	4853.08	de	DE
k91	1487.25	1666.51	e	E
k97	163.75	115.742	e	E

## Sheet: Average length
ANOVA table of average length
Source of Variability	SS	df	MS	F	P-value	F crit
Program	607796	12	50649.7	0.69863	0.742035	2.0327
Library	433070	3	144357	1.99116	0.132687	2.86627
Error	2.60995e+06	36	72498.6
Total	3.65082e+06	51
LSD multiple comparison
	Average length
Program	Average	Sd	Sig 5%	Sig 1%
k43	981.205	87.1747	a	A
k37	1007.52	102.88	a	A
k25	1008.06	100.186	a	A
k31	974.825	112.412	a	A
k49	950.183	106.43	a	A
k55	919.712	79.7988	a	A
k61	857.403	61.2879	a	A
k67	781.053	45.414	a	A
k73	752.832	47.099	a	A
k79	742.21	56.8219	a	A
k85	760.987	129.096	a	A
k91	857.898	264.264	a	A
k97	1073.43	926.294	a	A

## Sheet: N50 length
ANOVA table of N50 length
Source of Variability	SS	df	MS	F	P-value	F crit
Program	9.0429e+06	12	753575	0.687099	0.752477	2.0327
Library	6.36005e+06	3	2.12002e+06	1.933	0.141683	2.86627
Error	3.94829e+07	36	1.09675e+06
Total	5.48859e+07	51
LSD multiple comparison
	N50 length
Program	Average	Sd	Sig 5%	Sig 1%
k43	1232.75	111.775	ab	A
k37	1294	166.155	ab	A
k25	1296.75	165.351	ab	A
k31	1266.5	170.682	ab	A
k49	1215.5	176.806	ab	A
k55	1154.75	140.588	ab	A
k61	1050.25	119.402	ab	A
k67	921.75	101.956	b	A
k73	861.25	87.1832	b	A
k79	829.5	67.8847	b	A
k85	866.25	193.966	b	A
k91	1565	1338.44	ab	A
k97	2485.75	3642.46	a	A

## Sheet: Ns
ANOVA table of Ns
Source of Variability	SS	df	MS	F	P-value	F crit
Program	7.75769e-07	12	6.46474e-08	17.6414	1.34425e-11	2.0327
Library	5.30769e-08	3	1.76923e-08	4.82799	0.00631851	2.86627
Error	1.31923e-07	36	3.66453e-09
Total	9.60769e-07	51
LSD multiple comparison
	Ns
Program	Average	Sd	Sig 5%	Sig 1%
k43	0.0004	0.0002	a	A
k37	0.0002	0.0001	b	B
k25	0.0001	0.0001	b	BC
k31	0.0002	0.0001	b	B
k49	0	0.0001	c	CD
k55	0	0.0001	c	CD
k61	0	0	c	D
k67	0	0	c	D
k73	0	0	c	D
k79	0	0	c	D
k85	0	0	c	D
k91	0	0	c	D
k97	0	0	c	D
